# Supplementary material for: A study of anthocyanin self-association by NMR spectroscopy
Source: Royal Society of Chemistry journal article supplement (doi:10.1039/c4nj02339k), 2015-01-01
Supplement: c4nj02339k1.pdf [file c4nj02339k1.pdf]

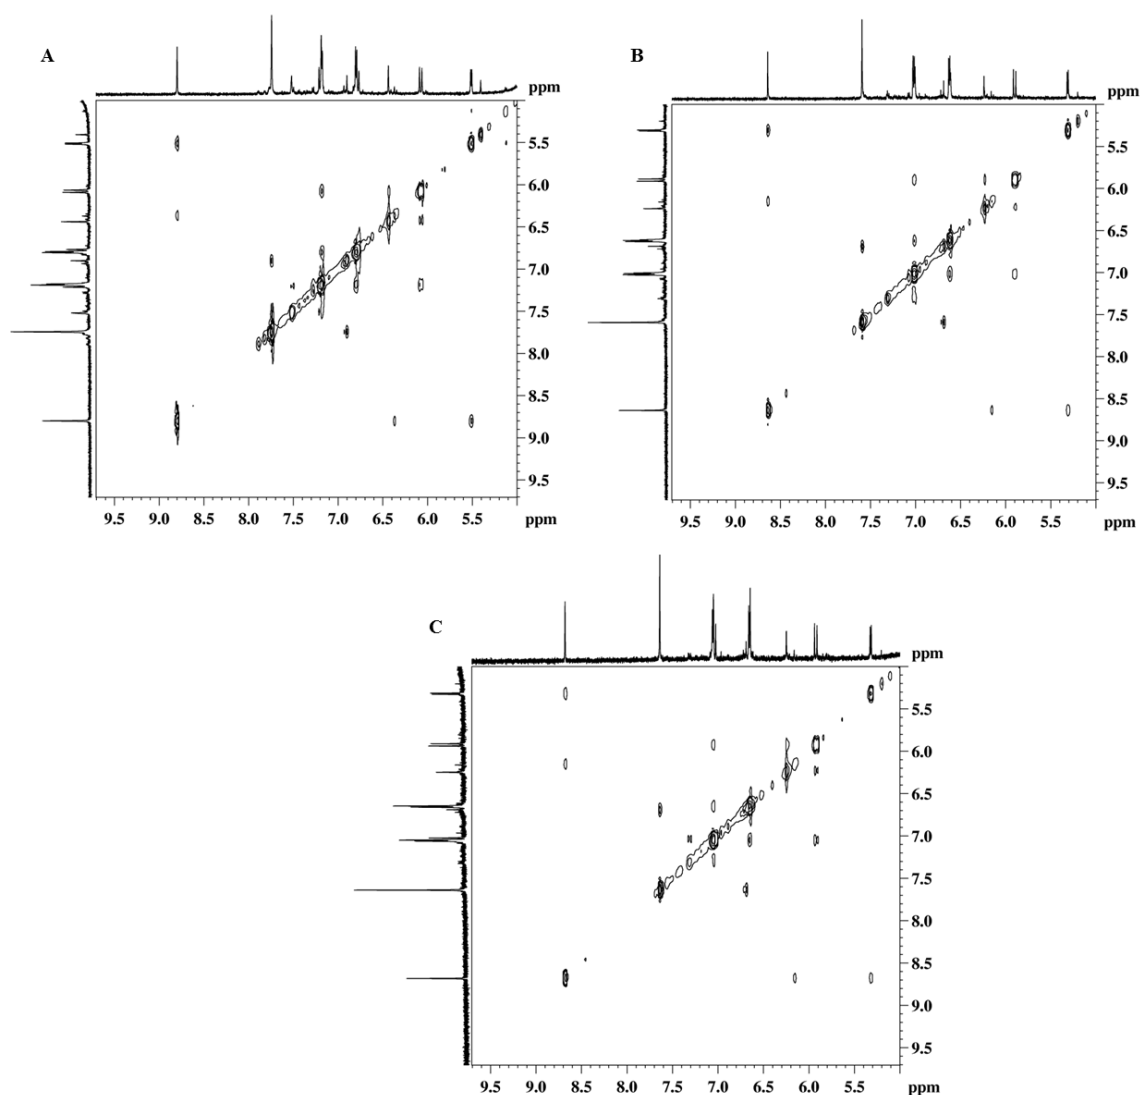

**Fig. SI-1** Portion of the 2D NOESY spectra of mv3cumglc (1.8 mM (A); 1.0 mM (B) and 0.6 mM (C)) acquired in D<sub>2</sub>O/DMSO (7:3) with a mixing time of 400 ms.

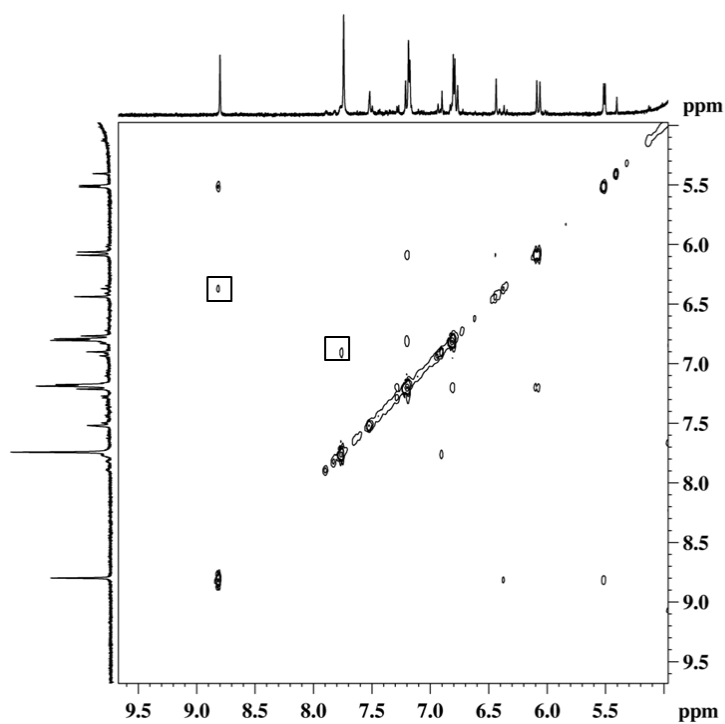

**Fig. 2 SI** Portion of the 2D ROESY spectra of mv3cumglc (1.8 mM) acquired in D<sub>2</sub>O/DMSO (7:3) with a mixing time of 400 ms, showing NOE interactions and chemical exchange peaks (in boxes).

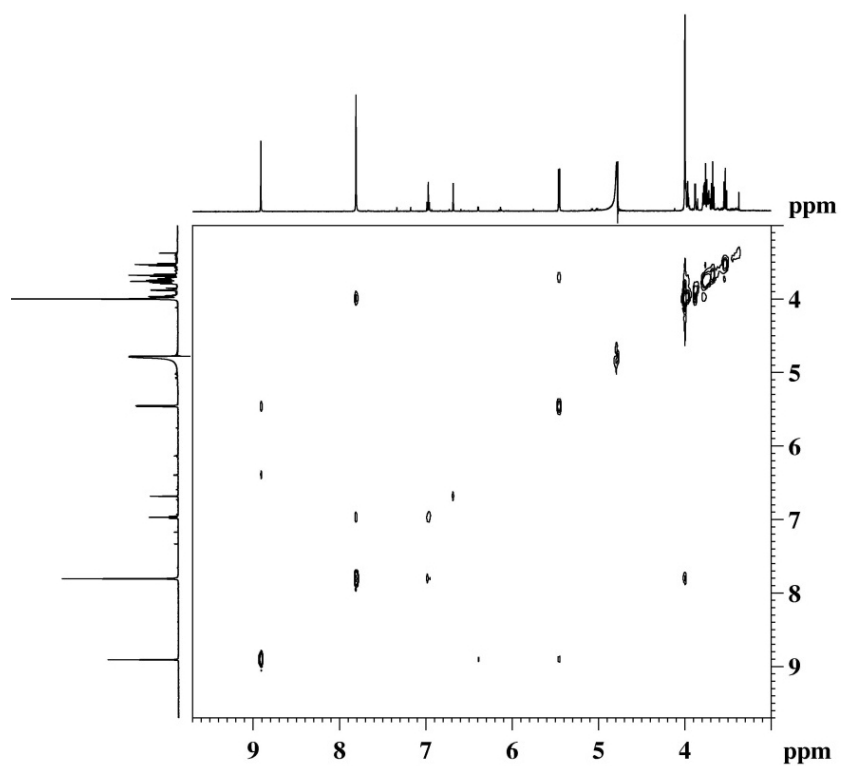

**Fig. 3 SI** Portion of the 2D NOESY spectra of mv3glc (2.0 mM) acquired in D<sub>2</sub>O/DMSO (7:3) with a mixing time of 400 ms.

| $\Delta\text{Energy} /$<br>$\text{kcal mol}^{-1}$ | Mv3cumglc                                                                           | $\Delta\text{Energy}$<br>$\text{kcal mol}^{-1}$ | (Mv3cumglc) <sub>2</sub>                                                              |
|---------------------------------------------------|-------------------------------------------------------------------------------------|-------------------------------------------------|---------------------------------------------------------------------------------------|
| 0.0                                               | 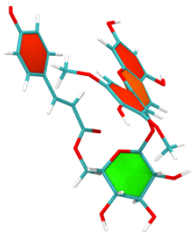   | 0.0                                             |    |
| 1.3                                               |    | 0.4                                             |    |
| 4.9                                               |   | 8.5                                             |   |
| 5.5                                               |  | 9.6                                             |  |
| 5.7                                               |  | 10.2                                            |  |

|     |                                                                                     |      |                                                                                       |
|-----|-------------------------------------------------------------------------------------|------|---------------------------------------------------------------------------------------|
| 6.2 | 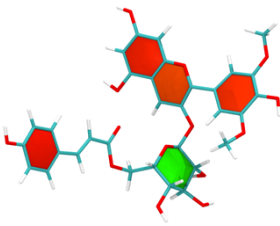   | 10.7 |    |
| 8.6 |    | 14.2 |    |
| 9.3 |   | 14.8 |    |
| 9.3 |  | 29.5 |  |
| 9.8 |  | 29.6 |   |

**Fig SI-4** Representation of the optimized representative geometries adopted by mv3cumglc and (mv3cumglc)<sub>2</sub> compounds along MD simulations.  $\Delta$ Energy values are also presented, relatively to the most stable structure (1<sup>st</sup> table line).
